# Supplementary material for: Effects of influent municipal wastewater microbial community and antibiotic resistance gene profiles on anaerobic membrane bioreactor effluent
Source: Oxford University Press journal article supplement (doi:10.2166/wrd.2022.018), 2022-08-20
Supplement: jwrd0120304supp1.pdf [file jwrd0120304supp1.pdf]

## Appendix A: Supplementary Material

### Effects of influent municipal wastewater microbial community and antibiotic resistance gene profiles on anaerobic membrane bioreactor effluent

Christelle Sawaya<sup>a</sup>, Charbel El Khoury<sup>a</sup>, Lama Ramadan<sup>a</sup>, Reem Deeb<sup>a</sup>, and Moustapha Harb<sup>a,\*</sup>

<sup>a</sup> Department of Civil and Environmental Engineering, Lebanese American University, 309 Bassil Building, Byblos, Lebanon

\*Corresponding author:  
Moustapha Harb  
305 Bassil Building, Byblos, Lebanon 2038-1401  
Phone: +961-9-547254  
Email: moustapha.harb@lau.edu.lb

**Table S1** Synthetic wastewater composition used prior to treating municipal wastewater.

| Concentrate solution |              | Dilution water      |              |
|----------------------|--------------|---------------------|--------------|
| Reagent              | Conc. (mg/L) | Reagent             | Conc. (mg/L) |
| Ammonium Chloride    | 12           | Sodium Bicarbonate  | 420          |
| Calcium Chloride     | 12           | Sodium Carbonate    | 420          |
| Iron Sulfate         | 6.08         | Potassium Phosphate | 24.2         |
| Sodium Sulfate       | 12           |                     |              |
| Sodium Acetate       | 321          |                     |              |
| Peptone              | 42.5         |                     |              |
| Yeast                | 127.5        |                     |              |
| Milk Powder          | 283.3        |                     |              |
| Starch               | 297.5        |                     |              |
| Copper Chloride      | 4.2          |                     |              |
| Manganese Sulfate    | 0.83         |                     |              |
| Lead Chloride        | 3.33         |                     |              |

**qPCR methods for gene quantification**

For standard preparation, PCR was conducted in 20  $\mu$ L reactions using 4  $\mu$ L of 5x FIREPol Master Mix (Solis BioDyne, USA), 1  $\mu$ L each of forward and reverse primers at 5  $\mu$ M, 1  $\mu$ L DNA template, and 13  $\mu$ L molecular-grade water. PCR products were run on a 1.5 % agarose gel and detected on a ChemiDoc Touching Imaging System (Bio-Rad Laboratories, USA). A sterile scalpel was used to excise bands, which were then purified using the GenElute Gel Extraction Kit (Sigma-Aldrich, USA) according to the manufacturer's protocol. Concentrations of gel extracts were quantified using the AccuGreen™ High Sensitivity dsDNA Quantitation Kit (Biotium) with a Qubit 2.0 Fluorometer (Thermo Fisher, USA). Thermocycling conditions for each primer set used in standard preparation are as shown in Table S2, but with the addition of a final elongation step. For qPCR, each reaction consisted of 20  $\mu$ L using 10  $\mu$ L of the Biotium Forget-Me-Not qPCR Master Mix, 1  $\mu$ L of 5  $\mu$ M each for forward and reverse primers, 1  $\mu$ L of the template, and 7  $\mu$ L of molecular-grade water. Standard curves were generated during qPCR using serial dilutions of the prepared standards at  $10^{-2}$  to  $10^{-8}$  of the stock concentration.

**Table S2** Primer sequences, thermocycling conditions, and amplicon sizes for all genes assessed by qPCR.

| Gene                     | Primers (5'-3')                                        | Preincubation  | Amplification                                | Cycles | Amplicon (bp) | Reference                    |
|--------------------------|--------------------------------------------------------|----------------|----------------------------------------------|--------|---------------|------------------------------|
| <i>sul1</i>              | F- CGCACCGGAAACATCGCTGCAC<br>R- TGAAGTTCCGCCGCAAGGCTCG | 95°C for 5 min | 95°C for 30 s, 55 °C for 30 s, 72°C for 60 s | 40     | 163           | (Pei et al., 2006)           |
| <i>sul2</i>              | F- TCCGGTGGAGGCCGGTATCTGG<br>R- CGGGAATGCCATCTGCCTTGAG | 95°C for 5 min | 95°C for 15 s, 56 °C for 30 s, 72°C for 40s  | 40     | 191           | (Pei et al., 2006)           |
| <i>tetC</i>              | F-GCGGGATATCGTCCATTCCG<br>R-GCGTAGAGGATCCACAGGACG      | 95°C for 5 min | 95°C for 30 s, 55 °C for 30 s, 72°C for 60s  | 40     | 207           | (Naas et al., 2011)          |
| <i>tetQ</i>              | F- AGAATCTGCTGTTTGCCAGTG<br>R- CGGAGTGTC AATGATATTGCA  | 95°C for 5 min | 95°C for 30 s, 55 °C for 30 s, 72°C for 60 s | 40     | 124           | (Naas et al., 2011)          |
| <i>ampC</i>              | F- CCTCTTGCTCCACATTTGCT<br>R- ACAACGTTTGCTGTGTGACG     | 95°C for 5 min | 95°C for 45 s, 58 °C for 60 s, 72°C for 60s  | 40     | 189           | (Szczepanowski et al., 2009) |
| <i>bla<sub>TEM</sub></i> | F-TTCCTGTTTTTGCTCACCCAG<br>R-CTCAAGGATCTTACCGCTGTTG    | 95°C for 5 min | 95°C for 45 s, 58 °C for 60 s, 72°C for 60s  | 40     | 445           | (Bibbal et al., 2007)        |
| <i>intl1</i>             | F- CTGGATTTTCGATCACGGCACG<br>R- ACATGCGTGTAATCATCGTCG  | 95°C for 5 min | 95°C for 30 s, 60 °C for 60 s, 72°C for 60s  | 40     | 196           | (Barlow et al., 2004)        |
| <i>rpoB</i>              | F- AACATCGGTTTGATCAAC<br>R- CGTTGCATGTTGGTACCCAT       | 94°C for 5 min | 94°C for 30 s, 50 °C for 90 s, 72°C for 90s  | 40     | 381           | (Dahlöf et al., 2000)        |

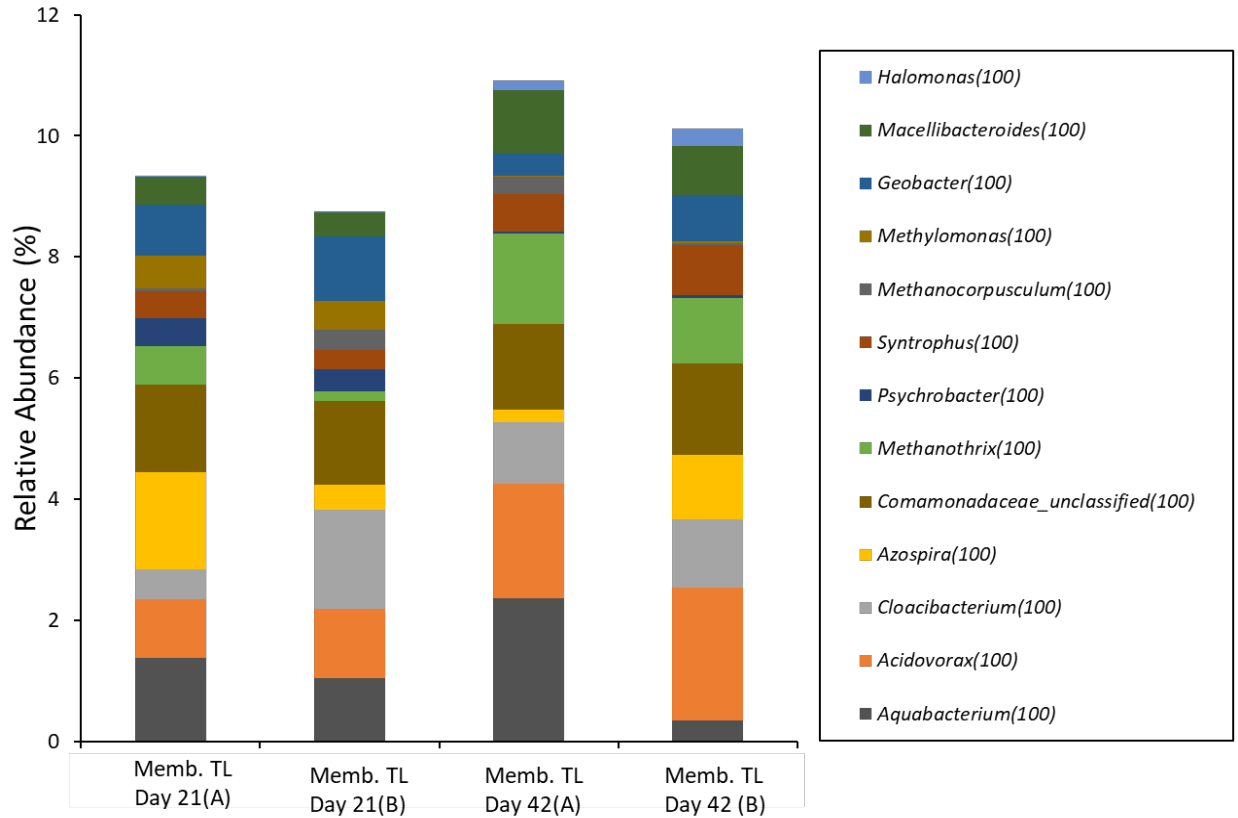

**Figure S1** Relative abundance (%) of microbial communities of the tightly-bound membrane biofilm layer (TL) from membranes harvested on Day 21 and Day 42 of the experiment. Groups shown represent microbial groups of relative abundance greater than 0.5% and less than 3% to illustrate methanogenic genera.

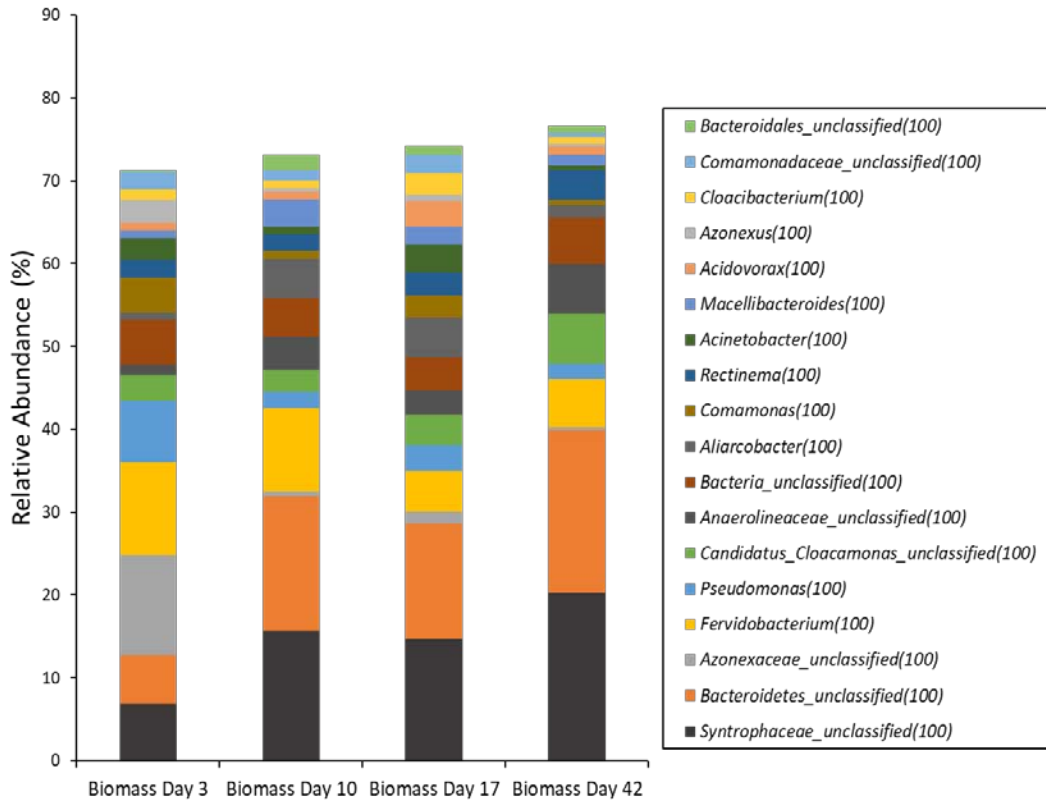

**Figure S2** Relative abundance (%) of microbial communities of the AnMBR reactor biomass on Days 3, 10, 17, and 42 of the experiment.

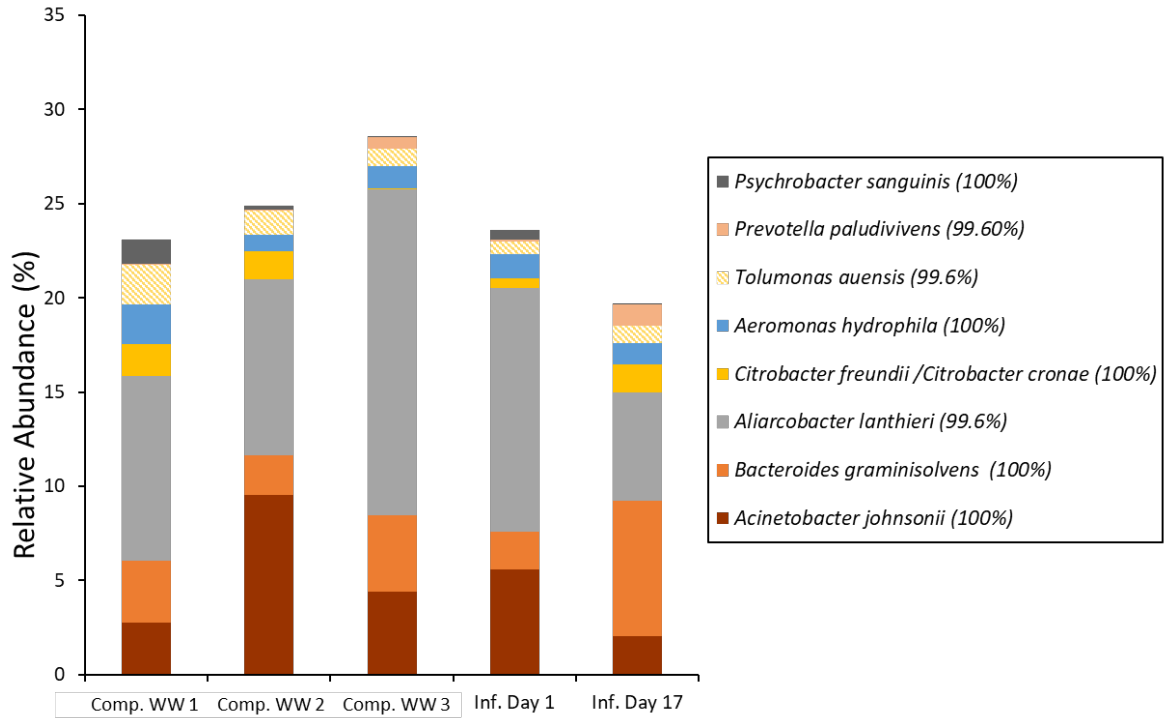

**Figure S3 2** Relative abundance (%) of microbial community operational taxonomic units (OTUs) in the influent wastewater associated with potentially pathogenic species from Day 1 and Day 17 of the experiment and three other municipal wastewater samples collected from the same seasonal timeframe.

## References

- Barlow, R.S., Pemberton, J.M., Desmarchelier, P.M., Gobius, K.S., 2004. Isolation and characterization of integron-containing bacteria without antibiotic selection. *Antimicrobial agents and chemotherapy* 48, 838-842.
- Bibbal, D., Dupouy, V., Ferré, J.-P., Toutain, P.-L., Fayet, O., Prère, M.-F., Bousquet-Mélou, A., 2007. Impact of three ampicillin dosage regimens on selection of ampicillin resistance in Enterobacteriaceae and excretion of blaTEM genes in swine feces. *Applied and Environmental Microbiology* 73, 4785-4790.
- Dahllöf, I., Baillie, H., Kjelleberg, S., 2000. rpoB-based microbial community analysis avoids limitations inherent in 16S rRNA gene intraspecies heterogeneity. *Applied and environmental microbiology* 66, 3376-3380.
- Naas, T., Ergani, A., Carrër, A., Nordmann, P., 2011. Real-time PCR for detection of NDM-1 carbapenemase genes from spiked stool samples. *Antimicrobial agents and chemotherapy* 55, 4038-4043.
- Pei, R., Kim, S.-C., Carlson, K.H., Pruden, A., 2006. Effect of river landscape on the sediment concentrations of antibiotics and corresponding antibiotic resistance genes (ARG). *Water research* 40, 2427-2435.
- Szczepanowski, R., Linke, B., Krahn, I., Gartemann, K.-H., Gützkow, T., Eichler, W., Pühler, A., Schlüter, A., 2009. Detection of 140 clinically relevant antibiotic-resistance genes in the plasmid metagenome of wastewater treatment plant bacteria showing reduced susceptibility to selected antibiotics. *Microbiology* 155, 2306-2319.
